# Supplementary material
Source: Springer Nature journal article supplement (https://www.springermedizin.de/resource/supplementary/12967_2012_1468_MOESM2_ESM.pdf/9574330)

## A) Gene Expression FOXP3

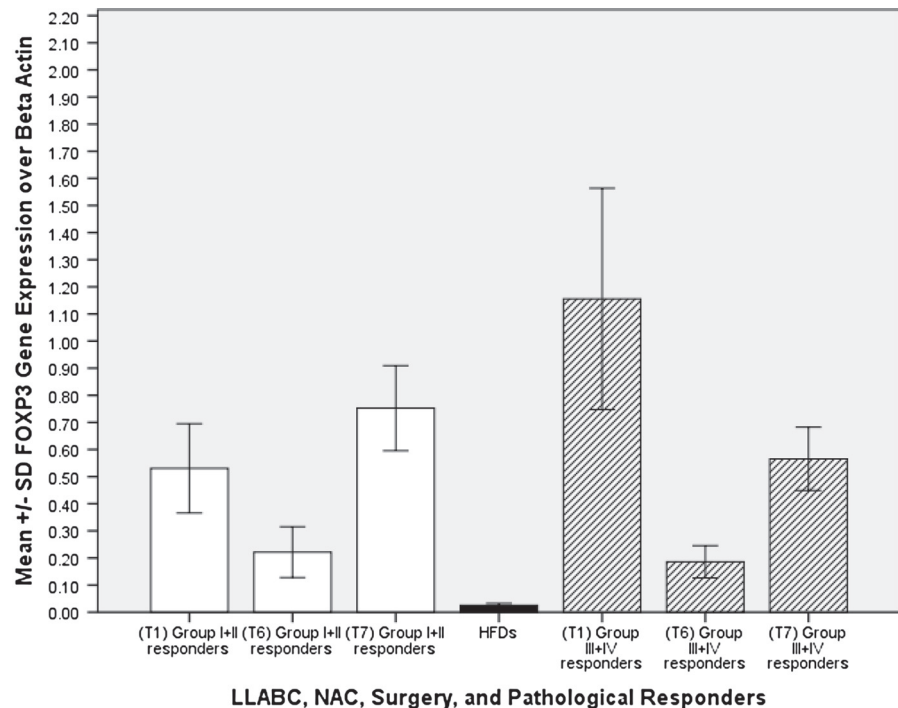

## B) Gene Expression CTLA-4

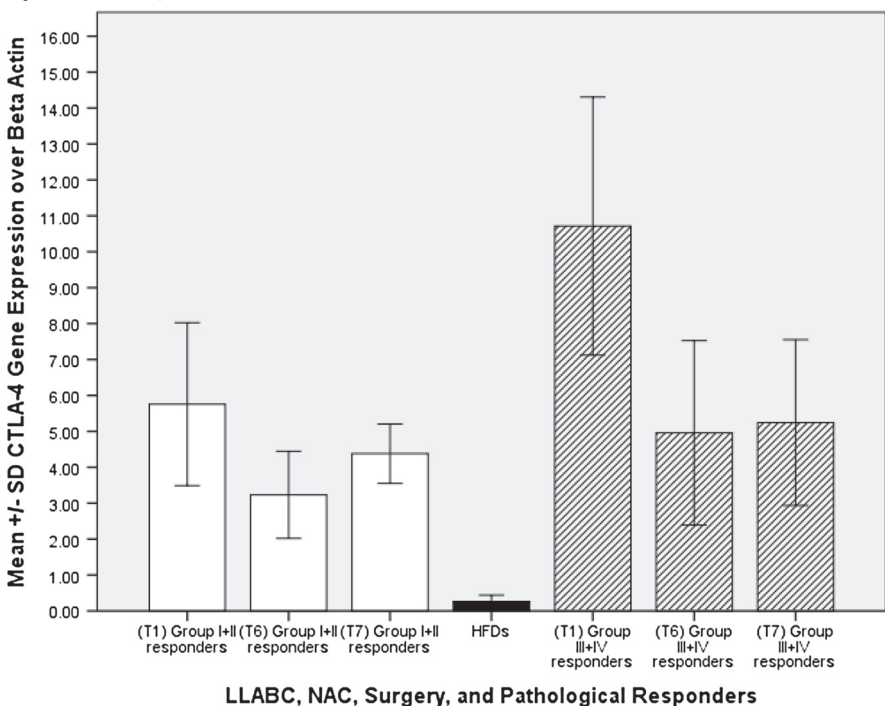

Supplement: MOESM2 [file 9574330]
